# Supplementary material
Source: publisher figshare collection journal article supplement (https://tandf.figshare.com/ndownloader/files/12556835)
Supplement: Supplementary file 1 [file 12556835]

**Supplementary Table 1** Gene set enrichment results in epithelial cells in ileum for each dietary treatment

|  |  |  |  |
| --- | --- | --- | --- |
| GENE SET NAMES1 | SIZE | NES | FDR q-val |
|  |  |  |  |
| *Beta glucans vs Control* |  |  |  |
| GROWTH_FACTOR_ACTIVITY | 27 | 1.98 | 0.026 |
| HYDROLASE_ACTIVITY_HYDROLYZING_O_GLYCOSYL_COMPOUNDS | 22 | 1.90 | 0.058 |
|  |  |  |  |
| *Fish Oil vs Control* |  |  |  |
| None |  |  |  |
|  |  |  |  |
| *Lysozyme vs Control* |  |  |  |
| CATION_HOMEOSTASIS | 57 | 1.86 | 0.057 |
| ION_HOMEOSTASIS | 67 | 1.79 | 0.064 |
| CELLULAR_CATION_HOMEOSTASIS | 55 | 1.79 | 0.069 |
| CELLULAR_HOMEOSTASIS | 76 | 1.77 | 0.070 |
| CHEMICAL_HOMEOSTASIS | 82 | 1.82 | 0.076 |
| KEGG_GLYCINE_SERINE_AND_THREONINE_METABOLISM | 21 | 1.79 | 0.079 |
| RESPONSE_TO_EXTRACELLULAR_STIMULUS | 19 | 1.86 | 0.084 |
| RESPONSE_TO_NUTRIENT_LEVELS | 18 | 1.90 | 0.088 |
| HOMEOSTATIC_PROCESS | 113 | 1.79 | 0.093 |
|  |  |  |  |
| *Quercetin vs Control* |  |  |  |
| KEGG_PRIMARY_IMMUNODEFICIENCY | 27 | 1.99 | 0.055 |
|  |  |  |  |
| *Quercitin vs Control* |  |  |  |
| ANION_TRANSMEMBRANE_TRANSPORTER_ACTIVITY | 24 | -1.91 | 0.074 |
|  |  |  |  |
| *Oat hulls vs Control* |  |  |  |
| ANION_TRANSMEMBRANE_TRANSPORTER_ACTIVITY | 24 | -1.96 | 0.016 |
| EMBRYONIC_DEVELOPMENT | 40 | -1.84 | 0.096 |

1 Gene sets are enriched in the underlined treatment
